# Supplementary material for: Production of cytotoxic compounds in dedifferentiated cells of Jatropha curcas L. (Euphorbiaceae)
Source: PeerJ. 2016 Nov 1;4:e2616. doi: 10.7717/peerj.2616 (PMC5101598; doi:10.7717/peerj.2616)
Supplement: Data S1 — Effect of plant hormones on callus production [file peerj-04-2616-s002.xlsx]

## Sheet: ANOVA_HID
	Tratamiento-2-4 D	19.3795
	Tratamiento-2-4 D,BAP	8.54855
	Tratamiento-2-4 D,BAP,KIN	21.5373
	Tratamiento-2-4 D,KIN	1
	Tratamiento-ANA	3.19624
	Tratamiento-ANA,2-4 D	7.12772
	Tratamiento-ANA,2-4 D,BAP	12.4636
	Tratamiento-ANA,2-4 D,BAP,KIN	26.3604
	Tratamiento-ANA,2-4 D,KIN	1
	Tratamiento-ANA,BAP	27.4655
	Tratamiento-ANA,BAP.KIN	43.4365
	Tratamiento-ANA,KIN	17.5687
	Tratamiento-BAP	12.8264
	Tratamiento-BAP,KIN	41.0234
	Tratamiento-KIN	9.96733
	Tratamiento-Testigo	1

## Sheet: ANOVA1_HID
	Tratamiento-2-4 D	15.7036
	Tratamiento-2-4 D,BAP	8.54855
	Tratamiento-2-4 D,BAP,KIN	26.6717
	Tratamiento-2-4 D,KIN	1
	Tratamiento-ANA	3.63549
	Tratamiento-ANA,2-4 D	7.12772
	Tratamiento-ANA,2-4 D,BAP	12.4636
	Tratamiento-ANA,2-4 D,BAP,KIN	32.7005
	Tratamiento-ANA,2-4 D,KIN	1
	Tratamiento-ANA,BAP	27.4655
	Tratamiento-ANA,BAP.KIN	54.0456
	Tratamiento-ANA,KIN	17.5687
	Tratamiento-BAP	12.8264
	Tratamiento-BAP,KIN	51.0293
	Tratamiento-KIN	9.96733
	Tratamiento-Testigo	1

## Sheet: ANOVA_HID1
	Tratamiento-2-4 D	25.506
	Tratamiento-2-4 D,BAP	8.54855
	Tratamiento-2-4 D,BAP,KIN	52.3433
	Tratamiento-2-4 D,KIN	1
	Tratamiento-ANA	3.63549
	Tratamiento-ANA,2-4 D	7.12772
	Tratamiento-ANA,2-4 D,BAP	12.4636
	Tratamiento-ANA,2-4 D,BAP,KIN	43.2673
	Tratamiento-ANA,2-4 D,KIN	1
	Tratamiento-ANA,BAP	67.1637
	Tratamiento-ANA,BAP.KIN	71.7275
	Tratamiento-ANA,KIN	42.4218
	Tratamiento-BAP	30.5659
	Tratamiento-BAP,KIN	67.7057
	Tratamiento-KIN	9.96733
	Tratamiento-Testigo	1

## Sheet: ANCOVA_HID
	Tratamiento-2-4 D	15.7036
	Tratamiento-2-4 D,BAP	8.54855
	Tratamiento-2-4 D,BAP,KIN	26.6717
	Tratamiento-2-4 D,KIN	1
	Tratamiento-ANA	3.63549
	Tratamiento-ANA,2-4 D	7.12772
	Tratamiento-ANA,2-4 D,BAP	12.4636
	Tratamiento-ANA,2-4 D,BAP,KIN	32.7005
	Tratamiento-ANA,2-4 D,KIN	1
	Tratamiento-ANA,BAP	27.4655
	Tratamiento-ANA,BAP.KIN	54.0456
	Tratamiento-ANA,KIN	17.5687
	Tratamiento-BAP	12.8264
	Tratamiento-BAP,KIN	51.0293
	Tratamiento-KIN	9.96733
	Tratamiento-Testigo	1

## Sheet: ANOVA1_HID1
	Auxina-2,4-D	8.41739
	Auxina-ANA	16.2232
	Auxina-Testigo	7.93123
	Auxina-2,4-D	8.54855	1	15.7036
	Auxina-ANA	27.4655	17.5687	3.63549
	Auxina-Testigo	12.8264	9.96733	1
	Citoquinina-BAP	16.2801
	Citoquinina-KIN	9.51202
	Citoquinina-Testigo	6.7797
	Citoquinina-BAP	8.54855	27.4655	12.8264
	Citoquinina-KIN	1	17.5687	9.96733
	Citoquinina-Testigo	15.7036	3.63549	1

## Sheet: ANOVA2_HID
	T-2,4-D	12.2817
	T-ANA	18.2445
	T-BAP	26.7863
	T-KIN	22.3741
	T-Testigo	1

## Sheet: ANOVA3_HID
	T-2,4-D	12.2817
	T-ANA	18.2445
	T-BAP	26.7863
	T-KIN	22.3741

## Sheet: ANOVA4_HID
	T-2,4-D	39.9733
	T-ANA	51.4069
	T-BAP	52.5727
	T-KIN	55.962

## Sheet: Hoja1
Treatment	Replication	Callus (g)	Callus (mg)	Square root of X+1		Treatment	Square root of X+1		ANALYSIS OF VARIANCE
Blank	1	0	0	1		ANA	14.1774			XLSTAT 2013.2.01 - ANOVA - on 10/23/2015 at 3:44:53 PM
Blank	2	0	0	1		ANA	31.6386			Y / Quantitative: Workbook = Callo Anova Marcos.xlsx / Sheet = Hoja1 / Range = Hoja1!$K$1:$K$149 / 148 rows and 1 column
Blank	3	0	0	1		ANA	60.8358			X / Qualitative: Workbook = Callo Anova Marcos.xlsx / Sheet = Hoja1 / Range = Hoja1!$J$1:$J$149 / 148 rows and 1 column
Blank	4	0	0	1		ANA	73.4915			Constraints: an=0
Blank	5	0	0	1		ANA	58.3181			Confidence interval (%): 95
ANA	1	0	0	1		ANA	41.2432			Tolerance: 0.0001
ANA	2	0	0	1		ANA	43.6005			Use least squares means: No
ANA	3	0.2	200	14.1774		ANA	87.1837
ANA	4	0	0	1		ANA	71.4213
ANA	5	0	0	1		ANA	56.5774			Regression of variable SQUARE ROOT OF X+1:
2-4 D	1	0	0	1		ANA	44.7325
2-4 D	2	0	0	1		ANA	36.0694			Goodness of fit statistics:
2-4 D	3	0.4	400	20.025		ANA	49
2-4 D	4	0.9	900	30.0167		2,4-D	20.025			Observations	148
2-4 D	5	0.7	700	26.4764		2,4-D	30.0167			Sum of weights	148
ANA,2-4 D	1	0	0	1		2,4-D	26.4764			DF	144
ANA,2-4 D	2	0	0	1		2,4-D	31.6386			R²	0.040824
ANA,2-4 D	3	1	1000	31.6386		2,4-D	38.7427			Adjusted R²	0.0208412
ANA,2-4 D	4	0	0	1		2,4-D	58.3181			MSE	691.079
ANA,2-4 D	5	0	0	1		2,4-D	49			RMSE	26.2884
BAP	1	0	0	1		2,4-D	55.6866			MAPE	1166.98
BAP	2	1.2	1200	34.6554		2,4-D	44.7325			DW	1.60611
BAP	3	0.7	700	26.4764		2,4-D	36.0694			Cp	4
BAP	4	0	0	1		2,4-D	49			AIC	971.607
BAP	5	0	0	1		BAP	34.6554			SBC	983.595
ANA,BAP	1	0	0	1		BAP	26.4764			PC	1.01246
ANA,BAP	2	0	0	1		BAP	60.8358
ANA,BAP	3	3.7	3700	60.8358		BAP	73.4915
ANA,BAP	4	5.4	5400	73.4915		BAP	38.7427			Analysis of variance:
ANA,BAP	5	0	0	1		BAP	58.3181
2-4 D,BAP	1	0	0	1		BAP	60.8358			Source	DF	Sum of squares	Mean squares	F	Pr > F
2-4 D,BAP	2	0	0	1		BAP	64.8151			Model	3	4235.53	1411.84	2.04295	0.049
2-4 D,BAP	3	1.5	1500	38.7427		BAP	77.4661			Error	144	99515.4	691.079
2-4 D,BAP	4	0	0	1		BAP	87.1837			Corrected Total	147	103751
2-4 D,BAP	5	0	0	1		BAP	71.4213			Computed against model Y=Mean(Y)
ANA,2-4 D,BAP	1	0	0	1		BAP	56.5774
ANA,2-4 D,BAP	2	0	0	1		BAP	49
ANA,2-4 D,BAP	3	3.4	3400	58.3181		BAP	55.6866			Model parameters:
ANA,2-4 D,BAP	4	0	0	1		BAP	1
ANA,2-4 D,BAP	5	0	0	1		BAP	44.7325			Source	Value	Standard error	t	Pr > |t|	Lower bound (95%)	Upper bound (95%)
KIN	1	2.1	2100	45.8367		BAP	36.0694			Intercept	22.3741	4.3814	5.10662	< 0.0001	13.714	31.0343
KIN	2	0	0	1		BAP	49			T-2,4-D	-10.0924	6.11416	-1.65066	0.100988	-22.1775	1.99271
KIN	3	0	0	1		KIN	45.8367			T-ANA	-4.12966	6.11416	-0.675426	0.500488	-16.2148	7.95543
KIN	4	0	0	1		KIN	41.2432			T-BAP	4.41221	6.19623	0.71208	0.477567	-7.8351	16.6595
KIN	5	0	0	1		KIN	43.6005			T-KIN	0	0
ANA,KIN	1	0	0	1		KIN	60.8358
ANA,KIN	2	0	0	1		KIN	64.8151
ANA,KIN	3	0	0	1		KIN	77.4661			Equation of the model:
ANA,KIN	4	1.7	1700	41.2432		KIN	87.1837
ANA,KIN	5	1.9	1900	43.6005		KIN	71.4213			Raíz cuadrada de X+1 = 22.3741198289807-10.0923827547276*T-2,4-D-4.12966190580854*T-ANA+4.41221445237368*T-BAP
2-4 D,KIN	1	0	0	1		KIN	56.5774
2-4 D,KIN	2	0	0	1		KIN	49
2-4 D,KIN	3	0	0	1		KIN	55.6866			Means charts:
2-4 D,KIN	4	0	0	1		KIN	44.7325
2-4 D,KIN	5	0	0	1		KIN	36.0694
ANA,2-4 D,KIN	1	0	0	1		KIN	49
ANA,2-4 D,KIN	2	0	0	1
ANA,2-4 D,KIN	3	0	0	1
ANA,2-4 D,KIN	4	0	0	1
ANA,2-4 D,KIN	5	0	0	1
BAP,KIN	1	3.7	3700	60.8358
BAP,KIN	3	4.2	4200	64.8151
BAP,KIN	4	0	0	1
BAP,KIN	5	6	6000	77.4661
ANA,BAP.KIN	2	7.6	7600	87.1837
ANA,BAP.KIN	3	5.1	5100	71.4213
ANA,BAP.KIN	4	0	0	1
ANA,BAP.KIN	5	3.2	3200	56.5774
2-4 D,BAP,KIN	1	0	0	1
2-4 D,BAP,KIN	2	2.4	2400	49
2-4 D,BAP,KIN	3	3.1	3100	55.6866
2-4 D,BAP,KIN	5	0	0	1
ANA,2-4 D,BAP,KIN	1	2	2000	44.7325
ANA,2-4 D,BAP,KIN	2	1.3	1300	36.0694
ANA,2-4 D,BAP,KIN	3	2.4	2400	49						T / Tukey (HSD) / Analysis of the differences between the categories with a confidence interval of 95%:
ANA,2-4 D,BAP,KIN	4	0	0	1
										Contrast	Difference	Standardized difference	Critical value	Pr > Diff	Significant
										BAP vs 2,4-D	14.5046	2.3723	2.59937	0.087105	Yes
										BAP vs ANA	8.54188	1.39706	2.59937	0.503248	No
										BAP vs KIN	4.41221	0.71208	2.59937	0.892174	Yes
										KIN vs 2,4-D	10.0924	1.65066	2.59937	0.353784	Yes
										KIN vs ANA	4.12966	0.675426	2.59937	0.906251	No
										ANA vs 2,4-D	5.96272	0.988684	2.59937	0.75612	No
										Tukey's d critical value:			3.67606
										Category	Mean	Groups
										BAP	26.7863	A
										KIN	22.3741	A
										ANA	18.2445	A	B
										2,4-D	12.2817		B

## Sheet: ANOVA3
	XLSTAT 2013.2.01 - ANOVA - on 10/23/2015 at 3:44:53 PM
	Y / Quantitative: Workbook = Callo Anova Marcos.xlsx / Sheet = Hoja1 / Range = Hoja1!$K$1:$K$149 / 148 rows and 1 column
	X / Qualitative: Workbook = Callo Anova Marcos.xlsx / Sheet = Hoja1 / Range = Hoja1!$J$1:$J$149 / 148 rows and 1 column
	Constraints: an=0
	Confidence interval (%): 95
	Tolerance: 0.0001
	Use least squares means: No
	Regression of variable Raíz cuadrada de X+1:
	Goodness of fit statistics:
	Observations	148
	Sum of weights	148
	DF	144
	R²	0.040824
	Adjusted R²	0.0208412
	MSE	691.079
	RMSE	26.2884
	MAPE	1166.98
	DW	1.60611
	Cp	4
	AIC	971.607
	SBC	983.595
	PC	1.01246
	Analysis of variance:
	Source	DF	Sum of squares	Mean squares	F	Pr > F
	Model	3	4235.53	1411.84	2.04295	0.049
	Error	144	99515.4	691.079
	Corrected Total	147	103751
	Computed against model Y=Mean(Y)
	Model parameters:
	Source	Value	Standard error	t	Pr > |t|	Lower bound (95%)	Upper bound (95%)
	Intercept	22.3741	4.3814	5.10662	< 0.0001	13.714	31.0343
	T-2,4-D	-10.0924	6.11416	-1.65066	0.100988	-22.1775	1.99271
	T-ANA	-4.12966	6.11416	-0.675426	0.500488	-16.2148	7.95543
	T-BAP	4.41221	6.19623	0.71208	0.477567	-7.8351	16.6595
	T-KIN	0	0
	Equation of the model:
	Raíz cuadrada de X+1 = 22.3741198289807-10.0923827547276*T-2,4-D-4.12966190580854*T-ANA+4.41221445237368*T-BAP
	Means charts:
	T / Tukey (HSD) / Analysis of the differences between the categories with a confidence interval of 95%:
	Contrast	Difference	Standardized difference	Critical value	Pr > Diff	Significant
	BAP vs 2,4-D	14.5046	2.3723	2.59937	0.087105	Yes
	BAP vs ANA	8.54188	1.39706	2.59937	0.503248	No
	BAP vs KIN	4.41221	0.71208	2.59937	0.892174	Yes
	KIN vs 2,4-D	10.0924	1.65066	2.59937	0.353784	Yes
	KIN vs ANA	4.12966	0.675426	2.59937	0.906251	No
	ANA vs 2,4-D	5.96272	0.988684	2.59937	0.75612	No
	Tukey's d critical value:			3.67606
	Category	Mean	Groups
	BAP	26.7863	A
	KIN	22.3741	A
	ANA	18.2445	A	B
	2,4-D	12.2817		B
